# Supplementary material for: Evaluation of Mental Foramen with Cone Beam Computed Tomography: A Systematic Review of Literature
Source: Radiol Res Pract. 2021 Jan 6;2021:8897275. doi: 10.1155/2021/8897275 (PMC7806401; doi:10.1155/2021/8897275)
Supplement: Supplementary Materials — Supplementary Material 1: design of selected publications. Supplementary Material 2: mean diameter of mental foramen and accessory mental foramen (mm). Supplementary Material 3: mean length of the anterior loop (mm). [file 8897275.f1.zip]

Archive with 3 entries (3 files):
- Supplementary material 1 (1).docx
- Supplementary material 2 (1).docx
- Supplementary material 3.docx
