# Supplementary material for: Evaluation of Mental Foramen with Cone Beam Computed Tomography: A Systematic Review of Literature
Source: Radiol Res Pract. 2021 Jan 6;2021:8897275. doi: 10.1155/2021/8897275 (PMC7806401; doi:10.1155/2021/8897275)
Supplement: Supplementary Materials — Supplementary Material 1: design of selected publications. Supplementary Material 2: mean diameter of mental foramen and accessory mental foramen (mm). Supplementary Material 3: mean length of the anterior loop (mm). [file 8897275.f1.zip › Supplementary material 2 (1).docx]

**Supplementary Material 2.** Mean diameter of mental foramen and accessory mental foramen (mm)

| Articles | | MF | AMF | | MF | | AMF | MF | | AMF | MF | | AMF | MF | | AMF | MF | |
| --- | --- | --- | --- | --- | --- | --- | --- | --- | --- | --- | --- | --- | --- | --- | --- | --- | --- | --- |
| general case | | | right | | | left | | | males | | | females | | | ipsilateral to the AMF | controlateral to the AMF or sides without AMF |
| [40] | | - | | 1.9 ± 0.6 ¶ | 3.24±0.63†§ | - | | 3.31±0.86†§ | - | | 3.54±0.73†§ | - | | 3.16±0.75†§ | - | | 3.8 ± 0.9 ¶ | 4.2 ± 0.5 ¶ |
| [48] | | - | | - | - | - | | - | - | | - | - | | - | - | | 3.83± 0.65 | 4.13 ± 0.62 |
| [45] | | 3.4‡  3.7§ | | 1.55±0.55†‡  1.4 ±0.35†§ | 3.8 ± 0.8‡  3.5 ± 0.8§ | 1.5 ± 0.5‡  1.4 ± 0.3§ | | 3.7 ± 0.8‡  3.4 ± 0.8§ | 1.6 ± 0.6‡  1.4 ± 0.4§ | | 3.95 ±0.8†‡  3.65 ±0.8†§ | 1.55 ±0.5†‡  1.45 ±0.4†§ | | 3.55±0.8 1‡  3.3 ± 0.7†§ | 1.55 ±0.6†‡  1.35 ±0.5†§ | | - | - |
| [46] | | 3.4 ± 0.88 | | - | - | - | | - | - | | 3.6 ± 0.81 | - | | 3.3 ± 0.78 | - | | - | - |
| [38] | a | 2.26 ± 0.67 | | - | - | - | | - | - | | 2.24± 0.62 | - | | 2.14 ± 0.53 | - | | - | - |
| b | 2.13 ± 0.47 | |
| [49] | |  | | - | - | - | | - | - | | - | - | | - | - | | 4.2 ± 1.2§ | 4.5 ± 1.3 |
| [15] | | 3.1‡  2.9§ | | - | - | - | | - | - | | - | - | | - | - | | - | - |
| [29] | | 2.34 ± 0.4 | | - | - | - | | - | - | | - | - | | - | - | | - | - |
| [37] [41] | | 3.59 ±1.96† | | - | 3.59 ± 2.74 | - | | 3.59 ± 1.17 | - | | - | - | | - | - | | - | - |
| [16] | | 2.95 ± 0.59 | | - | 2.82 ± 0.57 | - | | 3.07 ± 0.58 | - | | 3.08 ± 0.55 | - | | 2.81 ± 0.60 | - | | - | - |
| [18] | | - | | 1.80±0.66 ¶  1.12±0.39# | - | - | | - | - | | - | - | | - | - | | 4.0 ± 1.2 ¶  2.6 ± 0.7# | 4.7 ± 0.9 ¶  3.0 ± 0.7# |
| [19] | | - | | 1.54±1.41‡  1.44±0.41§ | - | - | | - | - | | - | - | | - | - | | - | - |
| [21] | | 4.44 ±1.13¶  2.92±0.75# | | - | - | - | | - | - | | - | - | | - | - | | - | - |
| [39] | | - | | - | 3.56 ±0.68‡  3.12 ±0.74§ | - | | 3.31 ±0.66‡  3.12 ±0.64§ | - | | 3.56 ±0.72‡  3.31 ±0.73§ | - | | 3.31 ±0.62‡  2.93 ±0.59§ | - | | - | - |
| [60] | | - | | 1.5±0.4 ¶  1.2 ±0.3# | - | - | | - | - | | - | - | | - | - | | - | - |
| [47] | | 2.80 ±0.99‡  3.11 ±0.89§ | | 1.27±0.40‡  1.50±0.63§ | - | - | | - | - | | 2.89 ±0.97‡  3.31 ±1.01§ | 1.27±0.45‡  1.50 ±0.51§ | | 2.75 ±0.84‡  3.03 ±0.83§ | 1.27±0.37‡  1.50±0.59§ | | - | - |
| [12] | | 3.20 ±0.88‡  3.11 ±0.75§ | | - | - | - | | - | - | | 3.32 ±0.86‡  3.41 ±0.93§ | - | | 3.14 ±0.89‡  2.99 ±0.63§ | - | | - | - |
| [57] | | - | | 1.38±0.47‡  1.23±0.37§ | - | 1.35±0.42‡  1.23±0.52§ | | - | 1.45±0.59‡  1.26±0.38§ | | - | 1.36±0.53†‡  1.24±0.39†§ | | - | 1.38±0.40†‡  1.21±0.36†§ | | 3.10±0.55‡  2.91±0.47§ | - |
| [24] | | 3.10 ±0.86‡  2.84 ±0.94§ | | 0.87±0.24 | - | - | | - | - | | - | - | | - | - | | - | - |
| [43] | | 2.08±0.53†§ | | - | 2.16 ± 1.9§ | - | | 2.07±0.54§ | - | | - | - | | - | - | | - | - |
| [25] | | - | | - | - | - | | - | - | | 3.08 ±0.65¶ | - | | 2.46 ±0.58¶ | - | | - | - |
| [50] | | - | | 1.74±0.75‡  1.36±0.54§ | - | - | | - | - | | - | 1.84±0.81‡  1.39±0.46§ | | - | 1.59±0.63‡  1.32±0.63§ | | 3.57±1.15‡  3.21±0,86§ | 3.98±1.10‡  3.68±0.85§ |
| [52] | | 4.11±1.07¶  2.80±0.72# | | 1.45±0.62¶  0.92±0.46# | - | - | | - | - | | - | - | | - | - | | - | - |

MF: mental foramen

AMF: accessory mental foramen

†: values calculated based on data from publications

‡: horizontal

§: vertical

¶: long

#: short
